# Supplementary material
Source: Springer Nature journal article supplement (https://www.springermedizin.de/resource/supplementary/13256_2010_1623_MOESM1_ESM.pdf/9648122)

m

120kV, 199mAs  
SC 430mm  
SW 5.5mm  
ST 14.1s  
Z 1.42

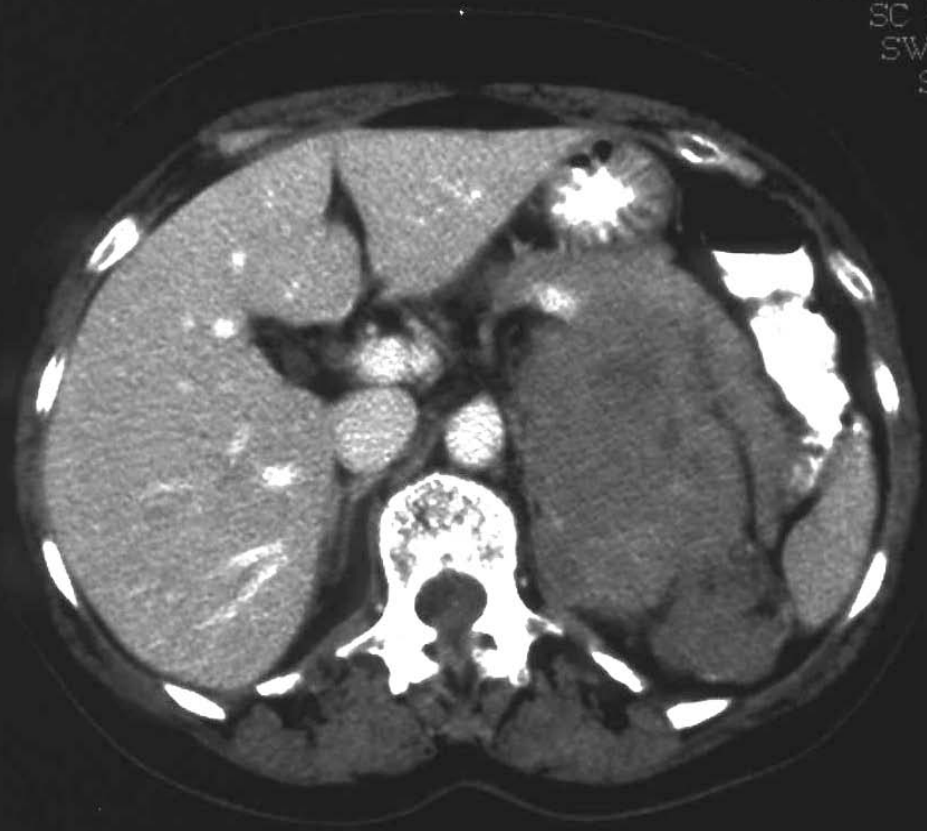

5 cm

R

L

C1 71  
M1 236

Supplement: MOESM1 [file 9648122]
